# Supplementary material for: Особенности становления финансовых супермаркетов в России
Source: Royal Society of Chemistry journal article supplement (doi:10.1039/d0ra03846f), 2009-07-23
Supplement: d0ra03846f1.pdf [file d0ra03846f1.pdf]

## Electronic Supplementary Information

### Enhancing the performance of blue quantum-dot light-emitting diodes through Incorporating polyethylene glycol to passivate ZnO as electron transport layer

Jun-hao Sun,<sup>a</sup> Jia-hui Huang,<sup>a</sup> Xu-yan Lan,<sup>a</sup> Feng-chun Zhang,<sup>a</sup> Ling-zhi Zhao,<sup>a,b,c</sup> and Yong Zhang<sup>\*a,b</sup>

<sup>a</sup>Institute of Semiconductor Science and Technology, South China Normal University, Guangzhou, 510631, China

<sup>b</sup>Guangdong Engineering Technology Research Center of Low Carbon and Advanced Energy Materials, Guangzhou, 510631, China

<sup>c</sup>SCNU Qingyuan Institute of Science and Technology Innovation Co., Ltd., Qingyuan 511517, China

\*Email: zycq@scnu.edu.cn

Figure S1-S4

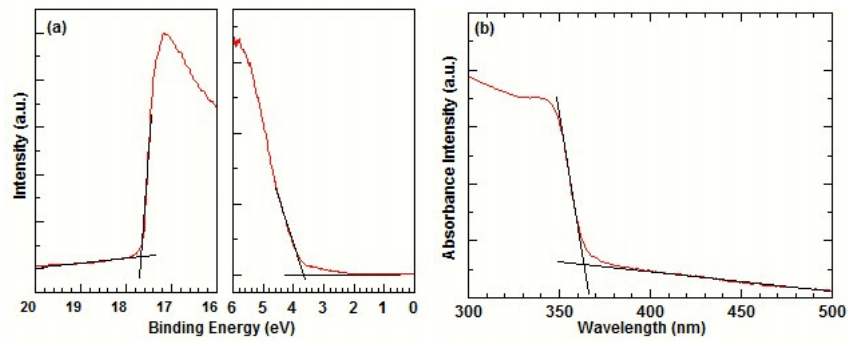

Figure S1 (a) UPS and (b) UV-visible spectra of PEG(4%):ZnO NP film

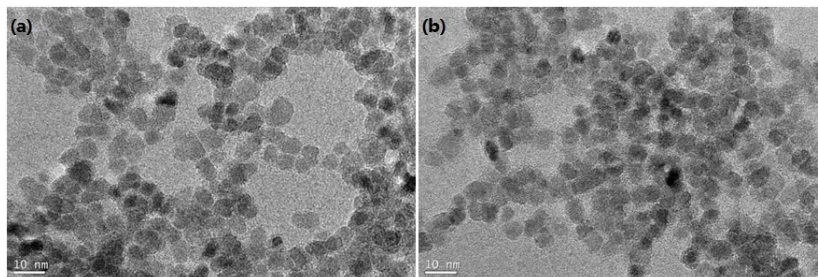

Figure S2 TEM images of ZnO and PEG(4%):ZnO NPs.

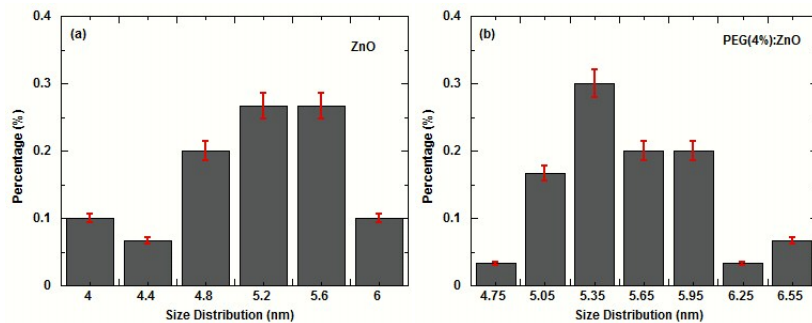

Figure S3 Histograms of the particle size distributions of ZnO and PEG(4%):ZnO NPs.

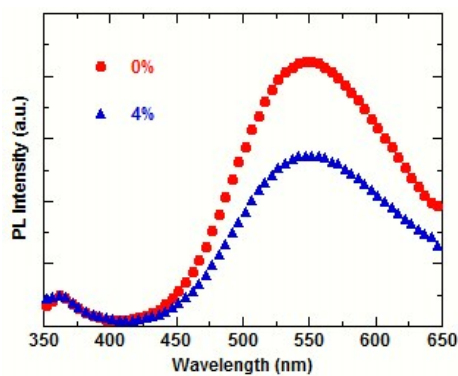

Figure S4 PL spectra of ZnO and PEG(4%):ZnO NP films.
